1 **Mycobacteria fecal shedding in wild boars (*Sus scrofa*), South-eastern France**

2

3 Mustapha Fellag<sup>1</sup>, Michel Drancourt<sup>1,\*</sup>, Jean-Lou Marié<sup>2</sup>, Bernard Davoust<sup>1,2</sup>

4 <sup>1</sup> Aix-Marseille Université, MEPHI, IRD, IHU Méditerranée Infection, Marseille,  
5 France.

6 <sup>2</sup> Animal Epidemiology Working Group of the Military Health Service, DRSSA Toulon,  
7 France.

8 \* Corresponding author: Prof. Michel Drancourt

9 E-mail: [michel.drancourt@mediterranee-infection.fr](mailto:michel.drancourt@mediterranee-infection.fr)

10

## 11 **ABSTRACT**

12 The recent recrudescence of tuberculosis in cattle has implicated wild boar as a  
13 reservoir and vector of this disease, which led to the investigation of fecal shedding of  
14 the causative *Mycobacterium bovis*. In the Provence region of France, wild boars are  
15 very abundant, and the current study was carried out to assess the presence of  
16 tuberculous and nontuberculous mycobacteria in feces of wild boar population. We  
17 developed an original protocol allowing the fast isolation of mycobacteria by  
18 combining a 1%-chlorhexidine decontamination of fecal matter with culture on MOD9  
19 medium. Colonies were identified by matrix-assisted laser desorption/ionization time-  
20 of-flight mass spectrometry, combined with DNA sequencing. This protocol yielded  
21 no tuberculous mycobacteria among ninety-nine wild boar fecal samples collected in  
22 the Provence region. However, non-tuberculous mycobacteria were isolated from five  
23 samples (5.05%), including *Mycobacterium peregrinum*, *Mycobacterium vaccae* and  
24 *Mycobacterium setense*, the last species being previously unreported in the wild  
25 boar; in addition to two positive samples for *Nocardia* spp. In conclusion, wild boars  
26 in southeastern France are not shedding tuberculosis agents, but they could  
27 constitute a reservoir of human non-tuberculous mycobacteriosis in selected  
28 populations directly exposed to wild boars.

## 29 INTRODUCTION

30 Bovine tuberculosis is a zoonosis due to *Mycobacterium bovis* (*M. bovis*) affecting  
31 both livestock and wild mammals <sup>1</sup>. Bovine tuberculosis is a contagious infection of  
32 significant health and economic importance and eradication programs have been  
33 implemented in a number of developed countries <sup>1,2</sup>. These programs yielded a  
34 remarkable reduction of the incidence of the disease <sup>1,3</sup>.

35 However, the wide distribution of *M. bovis* in wildlife is a major obstacle to the  
36 eradication of tuberculosis in cattle <sup>2,3</sup>. In numerous countries, bovine tuberculosis is  
37 maintained by multi-host systems involving cattle and wild mammals <sup>2-4</sup>. While the  
38 role of the red deer (*Cervus elaphus*) remains controversial <sup>3</sup>, the European badger  
39 (*Meles meles*) in Great Britain and Ireland and the wild boar (*Sus scrofa*) in the  
40 Iberian Peninsula are acknowledged reservoirs for *M. bovis* <sup>3,5</sup>. The latter species is  
41 also recognized as a host for other *Mycobacterium tuberculosis* complex, including  
42 *Mycobacterium microti* <sup>6</sup> and *Mycobacterium caprae* <sup>7</sup>. In addition, non-tuberculous  
43 mycobacteria that are widely distributed in the environment are not uncommon in wild  
44 boars, where they were isolated from lymph nodes <sup>8</sup> and feces <sup>9,10</sup>. These non-  
45 tuberculous mycobacteria have been identified as emerging human pathogens,  
46 especially in immunocompromised patients <sup>11,12</sup>.

47 Accordingly, naturally infected wild boars excrete *M. bovis* mycobacteria by oro-  
48 nasal and digestive routes, with inocula above 10<sup>3</sup> colony-forming units (CFU)/g <sup>13</sup>.  
49 Furthermore, it has been shown that *M. bovis* can persist in soil for several months<sup>14</sup>.  
50 Interactions between *M. bovis* and soil-inhabiting amoebae may increase the lifespan  
51 of mycobacteria, thus promoting their transmission throughout the environment<sup>15</sup>.  
52 Humans and animals may then be contaminated not only by direct contact with

53 infected wild animals, as is the case for hunters handling carcasses<sup>16</sup>, but also from a  
54 contaminated environment<sup>9</sup>.

55 For epidemiological investigations and the diagnosis of tuberculosis in wild  
56 animals, many techniques have been developed, including immunological,  
57 serological and molecular biology techniques but culture remains the gold standard  
58 technique for the diagnosis of tuberculosis mycobacteria infections<sup>17</sup>. The lymph  
59 nodes are the most frequently used sample for the research of mycobacteria in  
60 animals<sup>17-19</sup> but this invasive sampling made by well trained staff, is almost limited to  
61 dead animals. Therefore, the analysis of feces is an emerging method in wild animals  
62<sup>13,20-22</sup> on the model of what has been reported for the routine diagnosis in human  
63 patients<sup>23</sup>.

64 In France, the first cases of tuberculosis in wild animals were detected in 2001 in  
65 the Brotonne forest, Normandy<sup>2</sup>. Then, monitoring programs for tuberculosis in wild  
66 animals were applied and *M. bovis* was detected in badgers, wild boars, red deer, roe  
67 deer and red fox in proximity areas of bovine tuberculosis outbreak<sup>4,19,22,24</sup>. One case  
68 of tuberculosis was detected in a wild boar in Loir-et-Cher county which had  
69 remained free from bovine tuberculosis for more than twenty years<sup>25</sup>. In Southeastern  
70 France, there is a lack of information regarding the presence of tuberculosis and non-  
71 tuberculous mycobacteria in wild boars, except for information from the national  
72 surveillance system for tuberculosis in free-ranging wildlife (Sylvatub) which indicates  
73 that wild animals collect in this area are negative<sup>4</sup> whereas one study carried-out by  
74 serological methods that indirectly detected cases of *M. bovis*<sup>26</sup>.

75 Here, we investigated the presence and the shedding of *Mycobacterium*  
76 *tuberculosis complex* and nontuberculous mycobacteria in feces of wild boars living

77 in Provence region, France by using an original decontamination and culture  
78 protocol.

## 79 **Results**

80 **Artificially-infected feces samples.** Using NA-OH decontamination and culture on  
81 Coletsos medium, PBS negative controls remained sterile whereas culture of non-  
82 inoculated feces samples were invaded by contaminants. As for feces artificially  
83 inoculated with *M. bovis* BCG for ten days, one culture was positive with seven  
84 colonies of *M. bovis* BCG confirmed by MALDI-TOF-MS in addition to contaminants,  
85 the other two cultures were invaded by contaminants without presence colonies of *M.*  
86 *bovis* BCG. The contaminants were identified by MALDI-TOF-MS as various *Bacillus*  
87 species. Using chlorhexidine 1% decontamination and culture on MOD9 medium,  
88 PBS negative controls and non-inoculated feces remained sterile. As for feces  
89 artificially inoculated with  $10^5$  CFUs *M. bovis* BCG, non-frozen feces cultures yielded  
90 the first colonies of *M. bovis* BCG after seven and nine days of incubation and more  
91 than 100 colonies were observed after 20 days of incubation in one plate and 37  
92 colonies in the second culture plate. Only one *Sphingomonas paucimobilis*  
93 contaminant was observed on one of the two cultures. Feces artificially contaminated  
94 and frozen at  $-20^{\circ}\text{C}$  yielded *M. bovis* BCG colonies after nine-day incubation and  
95 after twenty-day incubation and 12 colonies were counted in one plate and only four  
96 on the second culture plate, in the absence of any contaminant. These data indicate  
97 a sensitivity of  $10^3$  CFUs (fresh feces) and  $10^4$  CFUs (frozen feces) on MOD9  
98 medium. This method of culture confirmed that feces artificially contaminated with  
99 BCG were negative for mycobacteria.

100 **Culture of wild boar feces.** A total of 99 wild boar feces were decontaminated using  
101 1% chlorhexidine and cultured on MOD9 medium. Colonies were observed after 4 to

102 8 days of incubation. Cultures obtained after one-month incubation were classified  
103 into four types: plates containing pure cultures of mycobacteria (n=1); plates  
104 containing mycobacteria mixed with contaminants (n=4); plates containing only  
105 contaminants (n= 15) including two positive *Nocardia* spp. cultures; and negative-  
106 culture plates (n= 79). No further colony was observed after three additional months  
107 of incubation (for a total of four-month incubation). None of these 99 samples yielded  
108 *M. bovis*, but non-tuberculous mycobacteria were cultivated in five samples which  
109 corresponds to a rate of 5.05%. *Mycobacterium vaccae* was isolated in one feces  
110 sample collected at military camp A, along with *Mycobacterium peregrinum* in three  
111 samples and *Mycobacterium setense* in one sample, collected at military camp B.  
112 These mycobacteria were all identified by MALDI-TOF-MS and confirmed by partial  
113 *rpoB* gene sequencing (Table 1). In addition, *Nocardia rhamnosiphila* was identified  
114 by 16S rRNA gene sequencing in one sample collected at military camp A and one  
115 *Nocardia* spp. isolate representative of a new *Nocardia* species in one sample  
116 collected in camp B<sup>27</sup>. MALDI-TOF-MS identified contaminants as *Pseudomonas*  
117 *putida*, *Pandoraeasputorum*, *Ralstonia pickettii*, *Sphingomonas paucimobilis* and  
118 *Sphingobacterium faecium* along with a non-identified fungus.

119

## 120 **DISCUSSION**

121 Culture-based investigation of wild boar feces collected in two geographic areas in  
122 the Provence region of France failed to find living tuberculous mycobacteria including  
123 *M. bovis*. This observation was made after an original protocol of feces  
124 decontamination and culture had been validated using the closely related *M. bovis*  
125 BCG strain, in the presence of negative controls which remained negative.

126 Culture remains the reference method for the routine confirmation of mycobacterial  
127 infection in animals<sup>1,28</sup>. The culture protocol herein described allows to detect an  
128 inoculum of 10<sup>3</sup>-10<sup>4</sup> CFUs *M. bovis* which is in the range of that extrapolated from  
129 PCR-based observations in wild boars in Spain<sup>15</sup>. However, contamination is a major  
130 limitation of culturing feces. Here, we applied to animal feces a 1% chlorhexidine  
131 decontamination and MOD9 medium culture protocol suitable for the recovery of  
132 *Mycobacterium tuberculosis complex* in patients on diagnosed with pulmonary  
133 tuberculosis<sup>29,30</sup>. Because the level of contamination of swine feces is very high, an  
134 efficient decontamination protocol is essential to isolate and culture mycobacteria  
135 from this type of sample<sup>20</sup>. In a first step, we validated this protocol using artificially  
136 inoculated feces. Then, we applied it for the first time on animal specimens combined  
137 with MOD9 medium protocol and found that this protocol was indeed suitable for the  
138 recovery of living mycobacteria from wild boar feces. These results contrasted with  
139 the standard NALC-NaOH decontamination and culture on Coletsos medium, which  
140 yielded contaminants invading the culture tubes.

141 Moreover, we observed fewer colonies of *M. bovis* BCG when culturing frozen  
142 feces compared to culturing fresh feces. The same observation was previously  
143 reported regarding the decreased viability of *M. bovis* after freezing<sup>13</sup>, whereas no  
144 effect of freezing at -20°C was reported when culturing *M. tuberculosis* from sputum  
145 specimens collected in patients<sup>31</sup>. As for feces, the recommendation is to cultivate  
146 fresh feces collected in cattle within less than 96 hours for the isolation and culture of  
147 *M. avium*<sup>21</sup>.

148 The 1% chlorhexidine decontamination and MOD9 culture protocol enabled the  
149 isolation of three non-tuberculous mycobacteria from five different wild boars with a  
150 prevalence of 5.05%, in the range of the previously reported 0% to 11.1% prevalence

151 of non-tuberculous mycobacteria in wild boar faeces<sup>10</sup>. In the lymph nodes,  
152 prevalence is 16.8% in Spain<sup>8</sup> whereas no mycobacteria could be detected in lymph  
153 nodes in another study in Poland<sup>32</sup> the prevalence of mycobacteria in wild boar  
154 varies among wild boar population, density and environment. *M. vaccae* was initially  
155 cultivated from cows in Austria<sup>33</sup> and has previously been isolated in wild boars in  
156 Australia<sup>9</sup>. *M. vaccae* is often considered a non-pathogenic mycobacterium<sup>34</sup> and  
157 has even been proposed as a vaccine for the treatment of multiresistant  
158 tuberculosis<sup>35</sup>. However, cases of pulmonary and skin infections have been  
159 described in human diseases<sup>12,33</sup>. Furthermore, *rpoB* gene sequencing confirmed the  
160 result obtained by MALDI-TOF and unambiguously<sup>36</sup> distinguished *M. peregrinum*  
161 from the closely related *M. septicum*. Indeed, the species are not differentiated by  
162 16S rRNA gene sequencing<sup>36</sup>. In animals, *M. peregrinum* has been described as an  
163 etiological agent of mycobacteriosis in farmed fish<sup>37</sup> was recently isolated in wild  
164 boar from Slovenia<sup>18</sup>. It is an opportunistic pathogen previously implicated in surgical  
165 site infections and catheter-related infections<sup>12,38</sup>. Regarding *M. setense* isolated  
166 here in one wild boar from military camp B, it has been described for the first time as  
167 being responsible for osteitis<sup>39,40</sup>. Furthermore, three cases have been reported in  
168 Italy<sup>12</sup> and Iran<sup>41</sup>. We report here on the first isolation of *M. setense* in wild boars. *M.*  
169 *peregrinum* and *M. setense* are two members of the *Mycobacterium fortuitum*  
170 complex, which is including rapidly growing non-tuberculous mycobacteria<sup>40</sup>  
171 distributed in the aquatic environment<sup>18,42</sup>. This may suggest the presence of these  
172 mycobacteria in the aquatic environments frequented by the wild boar at military  
173 camp B.

174 Moreover, the original culture protocol reported here allowed isolating two species  
175 of *Nocardia*. The first isolate was definitely identified as *N. rhamnosiphila* by 16S



176 rRNA gene sequencing. This species, initially identified from a compost mound  
177 sample in South Africa <sup>43</sup> has never been reported in animals and not in the humans.  
178 The second isolate here referred as *Nocardia* strain S-137 is a representative of a  
179 hitherto undescribed species: this isolate exhibited a non-identifying MALDI-TOF-MS  
180 spectrum, along with a 16S rRNA gene sequence exhibiting only 98% sequence  
181 similarity with *N. brasiliensis* strain FDAARGOS. Draft genome sequence and *in*  
182 *silico* DNA-DNA hybridization confirmed strain *Nocardia* S-137 as representative of a  
183 new species “*Nocardia suismassiliense*” <sup>27</sup>.

184 While the general population is not routinely exposed to wild boars, some selected  
185 populations chiefly hunted, are exposed in such way that wild boars do constitute the  
186 reservoir of zoonoses, as illustrated by the demonstration of cross-transmission of  
187 hepatitis E virus from wild boars to patients in our region <sup>44,45</sup>.

188 In conclusion, we found no evidence for living *Mycobacterium tuberculosis*  
189 complex, including *M. bovis*, in the feces of wild boars collected during 2015/2016  
190 hunting season in the Provence region of France whereas other actinomycetes  
191 including non-tuberculous mycobacteria, were easily cultured. The decontamination-  
192 culture protocol reported here can be used for routine, culture-based detection of  
193 mycobacteria and related bacteria in wild boar feces samples, a source of previously  
194 undescribed microorganisms.

## 195 **Materials and methods**

196 **Sample collection.** In order to study naturally excreted mycobacteria in wild boar  
197 feces, a total of 99 fecal samples were collected during the 2015/2016 hunting  
198 season in the Provence region (South-East of France). A total of 79 samples were  
199 collected in one military camp, A (Canjuers, Provence, France) (43°38'49"North; 6°

200 27°56"East) and 20 samples in another military camp, B (Carpagne, Provence,  
201 France) (43°15'02.1"North; 5°30'23.6"East). All samples, collected directly from the  
202 animal rectum by hunters were stored at -20 °C until cultured at the latest eight  
203 months after collection. No animals were killed specifically for this study and this work  
204 did not require animal experiment ethics approval.

205 **Artificially contaminated feces specimens.** *M. bovis* strain BCG was grown at  
206 37°C on Middlebrook 7H10 agar (Becton Dickinson, Pont de Claix, France)  
207 supplemented with oleic-albumin-dextrose-catalase (OADC) (Becton Dickinson). The  
208 colonies were suspended in a phosphate buffered saline (PBS), then rigorously  
209 vortexed using 3-mm sterile glass beads (Sigma-Aldrich, Saint-Quentin-Fallavier,  
210 France) and passed five times through a 25-G needle to disperse clustered cells. The  
211 homogenized suspensions were then calibrated at 10<sup>7</sup> CFU/mL by using optical  
212 density at 580 nm (Cell Density Meter; Fisher Scientific, Illkirch, France) and  
213 calibration curve. Feces of wild boar were inoculated with the suspension of *M. bovis*  
214 BCG to a final concentration 10<sup>6</sup> CFU/g. The artificially contaminated samples were  
215 separated into two batches, the first left at room temperature for four hours and the  
216 second being frozen at -20°C for one month in order to verify the viability of  
217 mycobacteria in frozen feces. The artificially infected samples were then  
218 decontaminated using two decontamination methods and cultured using two different  
219 culture media, in order to determine the more efficient culture method.

220 **Decontamination with NALC-NaOH and culture in Coletsos medium.**

221 Approximately 1 g of experimentally contaminated feces was placed in a 50-mL  
222 Falcon tube complemented with PBS up to 5 mL. An equal volume of N-acetyl-L-  
223 cysteine-sodium hydroxide (NALC-NaOH) was added and the tube was vortexed and  
224 incubated for 15 min at room temperature with continuous agitation. The remaining

225 volume was completed to 50 mL with a neutralization solution based on a phosphate  
226 buffer and centrifuged at 3,000 × g for 20 min. The supernatant was decanted, 1 mL  
227 of sterile PBS was added and 250 µL of the pellet-PBS suspension was inoculated,  
228 in triplicate, in Coletsos medium (bioMérieux, Craaponne, France). PBS and non-  
229 inoculated feces were used in parallel as controls for culture to survey for cross-  
230 contamination and all tubes were incubated at 37°C.

231 **Decontamination with chlorhexidine 1% and culture in MOD9 medium.** The  
232 MOD9 culture medium was prepared as previously described<sup>29,30</sup>. Briefly, MOD 9  
233 culture medium incorporates for a total volume of 1.000 mL, 5 g of lecithin, 19 g of  
234 Middlebrook 7H10 powder, one gram of yeast extract, two grams of glucose, one  
235 gram of pancreatic digest of casein, 5 mL of glycerol and 2 mL of Tween 80. All  
236 compounds were dissolved in 669 mL of distilled water and the mixture was  
237 autoclaved at 121°C for 20 min. Then 150 mL of lamb serum, 100 mL OADC (oleic  
238 acid albumin, dextrose, catalase), 20 mL of growth supplement (Becton Dickinson),  
239 50 mL of antibiotic mixture solution (5 mg of vancomycin, 6,000 units of polymyxin B,  
240 600 mg of amphotericin B, 2,400 mg of nalidixic acid, 600 mg of trimethoprim and  
241 600 mg of azlocillin), 4 mL of red food colouring and 0.1g of ascorbic acid were  
242 added after the medium was cooled to 55°C. This culture medium has been specially  
243 designed for the culture-based recovery of mycobacteria including *Mycobacterium*  
244 *tuberculosis complex*. Decontamination with 1% chlorhexidine was performed  
245 according to<sup>46</sup> modified by adding filtration as described below. About 1 g of  
246 experimentally contaminated feces was deposited into a 50 mL-tube containing 3-mm  
247 sterile glass beads, and the volume was completed to 5 mL with sterile PBS. The  
248 tube was vortexed and the suspension was filtered with 40 µm cell strainer to remove  
249 fibers and other large fecal particles. Two mL of this filtrate were mixed with a triple

250 volume of 1% chlorhexidine, vortexed and incubated for 15 min at room temperature  
251 with continuous agitation. The remaining volume was completed to 50 mL with PBS  
252 and centrifuged at 3000 X g for 20 min. The supernatant was then decanted, 1 mL of  
253 sterile PBS was added, and 100  $\mu$ L of the pellet-PBS suspension were inoculated, in  
254 duplicate, in MOD9 medium. PBS and non-inoculated feces were used in parallel as  
255 a negative control for culture to survey for cross contamination, and all plates were  
256 incubated at 37°C. This method was further used on to decontaminate and inoculate  
257 99 wild boar feces samples, including 79 samples collected at military camp A, and  
258 20 samples collected at military camp B.

259 **Artificially contaminated feces culture.** The cultures were observed regularly and  
260 *M. bovis* strain BCG colonies were counted and identified with the matrix-assisted  
261 laser desorption/ionization time-of-flight mass spectrometry (MALDI-TOF-MS) on a  
262 Microflex spectrometer (Bruker Daltonics, Bremen, Germany) <sup>47,48</sup> . Briefly, one loop-  
263 full of colonies was removed from the culture and directly applied to the plate and  
264 mixed with matrix. For each colony, three different spots were deposited on the mass  
265 spectrometer plate and the manipulation was repeated after subculture. The protein  
266 profiles were visualized using FlexControl 3.3 software (Bruker Daltonik) and  
267 analyzed by the program FlexAnalysis 3.3 (Bruker Daltonik GmbH, Bremen,  
268 Germany).

269 **Wild boar feces culture.** After four months incubation at 37°C, colonies observed  
270 were subcultured onto the same culture medium and incubated at the same  
271 temperature. An initial identification was carried out with MALDI-TOF-MS as  
272 previously described <sup>47,48</sup> . Colonies which remained not identified by MALDI-TOF-  
273 MS, were stained by the Ziehl-Neelsen method and examined by using light  
274 microscopy. Ziehl-Neelsen-positive colonies were subsequently identified by

275 sequencing PCR-amplified DNA. Genomic DNA was extracted using BIOROBOT  
276 EZ1 and the Qiagen Genomic DNA Extraction kit (Qiagen, Courtaboeuf, France) as  
277 previously described<sup>49</sup>. Sterile PBS was used as a negative control for extraction.  
278 The 16S rRNA gene PCR amplification and sequencing were performed using the  
279 fD1/rP2 primer pair as previously described<sup>50</sup>. The partial *rpoB* gene PCR  
280 amplification and sequencing were performed using the Myco F/Myco R primer pair  
281 <sup>51</sup>. Sequencing was carried-out using the Big Dye Terminator version 3.1 kit (Perkin-  
282 Elmer) and the resulting products were recorded with the Biosystems ABI Prism  
283 3130xl as described by the manufacturer (Applied Biosystems, Massachusetts,  
284 USA). The obtained nucleotide sequences were assembled using Chromas Pro  
285 software, version 1.7 (Technelysium Pty Ltd., Tewantin, Australia) and compared to  
286 the GenBank database by similarity search using the BLASTN program  
287 (<http://www.ncbi.nlm.nih.gov/blast/>).

288

289

290 **Declarations**

291 **Acknowledgements**

292 The authors thank the hunters of the military hunting companies of Canjuers and  
293 Carpiagne for their very efficient assistance in collecting the samples. This study was  
294 supported by IHU Méditerranée Infection, Marseille, France and by the French  
295 Government under the «Investissements d'avenir» (Investments for the Future)  
296 program managed by the Agence Nationale de la Recherche (ANR, fr: National  
297 Agency for Research), (reference: Méditerranée Infection 10-IAHU- 03). This work  
298 was supported by Région Provence Alpes Côte d'Azur and European funding  
299 FEDER PRIM1. M. Fellag benefits a PhD grant from Fondation Méditerranée  
300 Infection, Marseille, France. The authors acknowledge Olga Cusack for her expert  
301 assistance in editing the manuscript.

302 **Competing interests**

303 The authors declare that they have no competing interests

304 **Ethics approval and consent to participate**

305 No Ethics or use committee approval was required since the samples of faeces were  
306 collected at a slaughterhouse, on wild boars already killed during hunting according  
307 to procedures officially approved by the French authorities (rifle shooting with large  
308 caliber bullets) and by authorized hunters. The hunt was not organized for the  
309 purpose of sample collection; no animal was killed in the perspective of the present  
310 study.

311 **Consent to publish**

312 Not applicable.

313 **Availability of data and materials**

314 All data generated or analysed during this study are included in this article.

315 **References:**

- 316 1. Office International des Epizooties (OIE) bovine tuberculosis. In OIE Terrestrial  
317 Manual. Paris, France: OIE; 2009. Chapter 2.4.3.
- 318 2. Gortázar, C. *et al.* The status of tuberculosis in European wild mammals.  
319 *Mammal Rev.* **42**, 193–206 (2012).
- 320 3. Palmer, M. V. Mycobacterium bovis: characteristics of wildlife reservoir hosts.  
321 *Transbound. Emerg. Dis.* **60 Suppl 1**, 1–13 (2013).
- 322 4. Reveillaud, E. *et al.* Infection of wildlife by Mycobacterium bovis in France  
323 assessment through a national surveillance system, Sylvatub. *Front. Vet. Sci.* **5**,  
324 (2018).
- 325 5. Delahay, R. J., Cheeseman, C. L. & Clifton-Hadley, R. S. Wildlife disease  
326 reservoirs: the epidemiology of Mycobacterium bovis infection in the European  
327 badger (*Meles meles*) and other British mammals. *Tuberculosis* **81**, 43–49  
328 (2001).
- 329 6. Boniotti, M. B. *et al.* Detection and Molecular Characterization of Mycobacterium  
330 microti Isolates in Wild Boar from Northern Italy. *J. Clin. Microbiol.* **52**, 2834–2843  
331 (2014).
- 332 7. García-Jiménez, W. L. *et al.* Comparative pathology of the natural infections by  
333 Mycobacterium bovis and by Mycobacterium caprae in wild boar (*Sus scrofa*).  
334 *Transbound. Emerg. Dis.* **60**, 102–109 (2013).
- 335 8. García-Jiménez, W. L. *et al.* Non-tuberculous mycobacteria in wild boar (*Sus*  
336 *scrofa*) from Southern Spain: epidemiological, clinical and diagnostic concerns.  
337 *Transbound. Emerg. Dis.* **62**, 72–80 (2015).



- 338 9. Machackova, M. *et al.* Wild boar (*Sus scrofa*) as a possible vector of  
339 mycobacterial infections: Review of literature and critical analysis of data from  
340 Central Europe between 1983 to 2001. *ResearchGate* **48**, 51–65 (2003).
- 341 10. Trcka, I. *et al.* Mycobacterial infections in European wild boar (*Sus scrofa*) in the  
342 Czech Republic during the years 2002 to 2005. *ResearchGate* **51**, (2006).
- 343 11. García-Agudo, L & García-Martos, P. Clinical significance and antimicrobial  
344 susceptibility of rapidly growing mycobacteria. *Sci. Microb. Pathog. Commun.*  
345 *Curr. Res. Technol. Adv.* **77**, 363–377 (2011).
- 346 12. Van der Werf, M. J. *et al.* Inventory study of non-tuberculous mycobacteria in the  
347 European Union. *BMC Infect. Dis.* **14**, 62 (2014).
- 348 13. Santos, N. *et al.* Patterns of Mycobacterium tuberculosis-complex excretion and  
349 characterization of super-shedders in naturally-infected wild boar and red deer.  
350 *Vet. Res.* **46**, 129 (2015).
- 351 14. Ghodbane, R. *et al.* M. Long-term survival of tuberculosis complex mycobacteria  
352 in soil. *Microbiol. Read. Engl.* **160**, 496–501 (2014).
- 353 15. Drancourt, M. Looking in amoebae as a source of mycobacteria. *Microb. Pathog.*  
354 **77**, 119–124 (2014).
- 355 16. Wilkins, M. J. *et al.* Human Mycobacterium bovis Infection and Bovine  
356 Tuberculosis Outbreak, Michigan, 1994–2007. *Emerg. Infect. Dis.* **14**, 657–660  
357 (2008).
- 358 17. Gw, De. L. *et al.* Tuberculosis in free-ranging wildlife: detection, diagnosis and  
359 management. *Rev. Sci. Tech. Int. Off. Epizoot.* **21**, 317–334 (2002).
- 360 18. Pate, M. *et al.* Mycobacterium spp. in wild game in Slovenia. *Vet. J. Lond. Engl.*  
361 **1997** **208**, 93–95 (2016).

- 362 19. Zanella, G. *et al.* Mycobacterium bovis in wildlife in france. *J. Wildl. Dis.* **44**, 99–  
363 108 (2008).
- 364 20. Oliveira, E. M. de D. *et al.* Comparison of methods for mycobacteria isolation from  
365 swine feces. *Braz. J. Microbiol.* **38**, 687–692 (2007).
- 366 21. Whipple, D. L., Callihan, D. R. & Jarnagin, J. L. Cultivation of Mycobacterium  
367 paratuberculosis from bovine fecal specimens and a suggested standardized  
368 procedure. *J. Vet. Diagn. Investig. Off. Publ. Am. Assoc. Vet. Lab. Diagn. Inc* **3**,  
369 368–373 (1991).
- 370 22. Michelet, L. *et al.* Mycobacterium bovis Infection of Red Fox, France. *Emerg.*  
371 *Infect. Dis.* **24**, 1150–1153 (2018).
- 372 23. Asmar, S. & Drancourt, M. Rapid culture-based diagnosis of pulmonary  
373 tuberculosis in developed and developing countries. *Front. Microbiol.* **6**, (2015).
- 374 24. Hars, J., Richomme, C., Rivière, J., Faure, E. & Boschiroli, M. L. Dix années de  
375 surveillance de la tuberculose bovine dans la faune sauvage française et  
376 perspectives. *Bull. Epid. Santé anim. Alim*, 52, 2-6. (2012).
- 377 25. Chevalier, F. *et al.* Découverte d'un sanglier infecté par M. bovis en Sologne. *Bull*  
378 *Epid Santé anim Alim* 72:12–16. (2015).
- 379 26. Richomme, C. *et al.* Exposure of Wild Boar to Mycobacterium tuberculosis  
380 Complex in France since 2000 Is Consistent with the Distribution of Bovine  
381 Tuberculosis Outbreaks in Cattle. *PLOS ONE* **8**, e77842 (2013).
- 382 27. Fellag, M. *et al.* Draft Genome Sequence of “Nocardia suis massiliense” Strain S-  
383 137 (CSUR P4007). *Genome Announc.* **6**, e00212-18 (2018).
- 384 28. Office International des Epizooties (OIE) Paratuberculosis (Johne’s disease). In  
385 OIE Terrestrial Manual. Paris, France: OIE; 2014. Chapter 2.1.15.

- 386 29. Ghodbane, R., Raoult, D. & Drancourt, M. Dramatic reduction of culture time of  
387 *Mycobacterium tuberculosis*. *Sci. Rep.* **4**, 4236 (2014).
- 388 30. Asmar, S. *et al.* A Novel Solid Medium for Culturing *Mycobacterium tuberculosis*  
389 Isolates from Clinical Specimens. *J. Clin. Microbiol.* **53**, 2566–2569 (2015).
- 390 31. Tessema, B., Beer, J., Emmrich, F., Sack, U. & Rodloff, A. C. Rate of recovery of  
391 *Mycobacterium tuberculosis* from frozen acid-fast-bacillus smear-positive sputum  
392 samples subjected to long-term storage in Northwest Ethiopia. *J. Clin. Microbiol.*  
393 **49**, 2557–2561 (2011).
- 394 32. Witkowski, L. *et al.* Evidence of low prevalence of mycobacterial lymphadenitis in  
395 wild boars (*Sus scrofa*) in Poland. *Acta Vet. Scand.* **59**, 9 (2017).
- 396 33. Hachem, R. *et al.* Cutaneous and pulmonary infections caused by *Mycobacterium*  
397 *vaccae*. *Clin. Infect. Dis. Off. Publ. Infect. Dis. Soc. Am.* **23**, 173–175 (1996).
- 398 34. Lowry, C. A. *et al.* Identification of an immune-responsive mesolimbocortical  
399 serotonergic system: Potential role in regulation of emotional behavior.  
400 *Neuroscience* **146**, 756–772 (2007).
- 401 35. Weng, H., Huang, J.-Y., Meng, X.-Y., Li, S. & Zhang, G.-Q. Adjunctive therapy of  
402 *Mycobacterium vaccae* vaccine in the treatment of multidrug-resistant  
403 tuberculosis: A systematic review and meta-analysis. *Biomed. Rep.* **4**, 595–600  
404 (2016).
- 405 36. Kazumi, Y. & Mitarai, S. The evaluation of an identification algorithm for  
406 *Mycobacterium* species using the 16S rRNA coding gene and *rpoB*. *Int. J.*  
407 *Mycobacteriology* **1**, 21–28 (2012).
- 408 37. Aranaz, A. *et al.* *Mycobacterium peregrinum* infection in farmed European tench  
409 (*Tinca tinca* L.). *Vet. Microbiol.* **131**, 393–399 (2008).

- 410 38. Nagao, M. *et al.* Surgical site infection due to *Mycobacterium peregrinum*: a case  
411 report and literature review. *Int. J. Infect. Dis. IJID Off. Publ. Int. Soc. Infect. Dis.*  
412 **13**, 209–211 (2009).
- 413 39. Lamy, B., Marchandin, H., Hamitouche, K. & Laurent, F. *Mycobacterium setense*  
414 sp. nov., a *Mycobacterium fortuitum*-group organism isolated from a patient with  
415 soft tissue infection and osteitis. *Int. J. Syst. Evol. Microbiol.* **58**, 486–490 (2008).
- 416 40. Toro, A., Adekambi, T., Cheynet, F., Fournier, P.-E. & Drancourt, M.  
417 *Mycobacterium setense* infection in humans. *Emerg. Infect. Dis.* **14**, 1330–1332  
418 (2008).
- 419 41. Shojaei, H. *et al.* First Report on Isolation and Molecular Characterization of  
420 Clinical *Mycobacterium setense* Isolates in Asia. *Jpn. J. Infect. Dis.* **64**, 234-236.  
421 (2011).
- 422 42. Rech, G. *et al.* Draft Genome Sequences of *Mycobacterium setense* Type Strain  
423 DSM-45070 and the Nonpathogenic Strain *Manresensis*, Isolated from the Bank  
424 of the Cardener River in Manresa, Catalonia, Spain. *Genome Announc.* **3**,  
425 e01485-14 (2015).
- 426 43. Everest, G. J., Cook, A. E., le Roes-Hill, M. & Meyers, P. R. *Nocardia*  
427 *rhamnosiphila* sp. nov., isolated from soil. *Syst. Appl. Microbiol.* **34**, 508–512  
428 (2011).
- 429 44. Kaba, M., Davoust, B., Marié, J.-L. & Colson, P. Detection of hepatitis E virus in  
430 wild boar (*Sus scrofa*) livers. *Vet. J.* **186**, 259–261 (2010).
- 431 45. Colson, P. *et al.* Pig Liver Sausage as a Source of Hepatitis E Virus Transmission  
432 to Humans. *J. Infect. Dis.* **202**, 825–834 (2010).
- 433 46. Asmar, S. & Drancourt, M. Chlorhexidine decontamination of sputum for culturing  
434 *Mycobacterium tuberculosis*. *BMC Microbiol.* **15**, 155 (2015).

- 435 47. Seng, P. *et al.* Ongoing Revolution in Bacteriology: Routine Identification of  
436 Bacteria by Matrix-Assisted Laser Desorption Ionization Time-of-Flight Mass  
437 Spectrometry. *Clin. Infect. Dis.* **49**, 543–551 (2009).
- 438 48. Zingue, D., Flaudrops, C. & Drancourt, M. Direct matrix-assisted laser desorption  
439 ionisation time-of-flight mass spectrometry identification of mycobacteria from  
440 colonies. *Eur. J. Clin. Microbiol. Infect. Dis. Off. Publ. Eur. Soc. Clin. Microbiol.*  
441 **35**, 1983–1987 (2016).
- 442 49. Djouadi, L. N. *et al.* *Mycobacterium* icosiumassiliensis sp. nov., a New Member in  
443 the *Mycobacterium terrae* Complex Isolated from Surface Water in Algeria. *Curr.*  
444 *Microbiol.* **73**, 255–264 (2016).
- 445 50. Drancourt, M. *et al.* 16S Ribosomal DNA Sequence Analysis of a Large Collection  
446 of Environmental and Clinical Unidentifiable Bacterial Isolates. *J. Clin. Microbiol.*  
447 **38**, 3623–3630 (2000).
- 448 51. Adékambi, T., Colson, P. & Drancourt, M. *rpoB*-based identification of  
449 nonpigmented and late-pigmenting rapidly growing mycobacteria. *J. Clin.*  
450 *Microbiol.* **41**, 5699–5708 (2003).

451

452

453 **Table 1. Non-tuberculous mycobacteria isolated form wild-boar feces and**  
 454 **identified by *rpoB* sequencing; along with *Nocardia* species identified by 16S**  
 455 **rRNA sequencing.**

| Bacterial species               | Number positive | Match of GenBank (%) | GenBank accession          | MALDI-TOF score                       |
|---------------------------------|-----------------|----------------------|----------------------------|---------------------------------------|
| <i>Mycobacterium peregrinum</i> | 3               | 99                   | <a href="#">AY147166.1</a> | Identified with a high score (2.033)  |
| <i>Mycobacterium setense</i>    | 1               | 100                  | <a href="#">HM807426.1</a> | Identified with a middle score (1.88) |
| <i>Mycobacterium vaccae</i>     | 1               | 100                  | <a href="#">CP011491.1</a> | Identified with a high score (1.915)  |
| <i>Nocardia rhamnosiphila</i>   | 1               | 100                  | <a href="#">KC417288.1</a> | Not identified                        |
| Nocardia Strain S-137           | 1               | 98                   | <a href="#">CP022088.2</a> | Not identified                        |

456
